# Supplementary material for: Increase of spatiotemporal resolution and reproducible layer thicknesses in cationic vat photopolymerization
Source: Royal Society of Chemistry journal article supplement (doi:10.1039/d4py01046a), 2024-11-05
Supplement: d4py01046a1.pdf [file d4py01046a1.pdf]

## Supporting information

### Increase of Spatiotemporal Resolution and Reproducible Layer Thicknesses in Cationic Vat Photopolymerization

Emile Goldbach, Xavier Allonas, Christian Ley, Lucile Halbardier, Céline Croutxé-Barghorn

**Table S1.** Composition of the formulations based on 1,3-bis[2-(3,4-epoxycyclohexyl)ethyl]-tetramethyldisiloxane used in this study.

| Formulation | [ITX] (mM) | [Speedcure 937] (mM) | [DMPy] (mM) | [2PL] (mM) |
|-------------|------------|----------------------|-------------|------------|
| 1           | 0,024      | 0,028                | 0           | 0          |
| 2           | 0,024      | 0,028                | 2           | 0          |
| 3           | 0,024      | 0,028                | 5           | 0          |
| 4           | 0,024      | 0,028                | 10          | 0          |
| 5           | 0,024      | 0,028                | 0           | 2          |
| 6           | 0,024      | 0,028                | 0           | 5          |
| 7           | 0,024      | 0,028                | 0           | 10         |

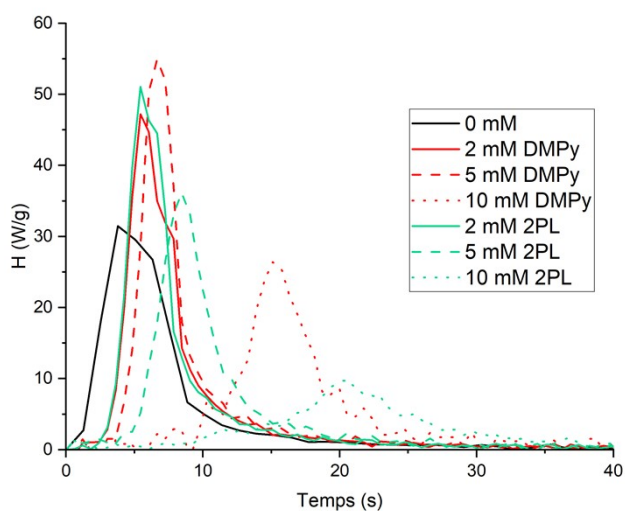

**Figure S1.** Change in the calculated heat flow  $H$  with time (according to eq.1) for formulations with 0, 2, 5 and 10 mM of DMPy and 2PL.

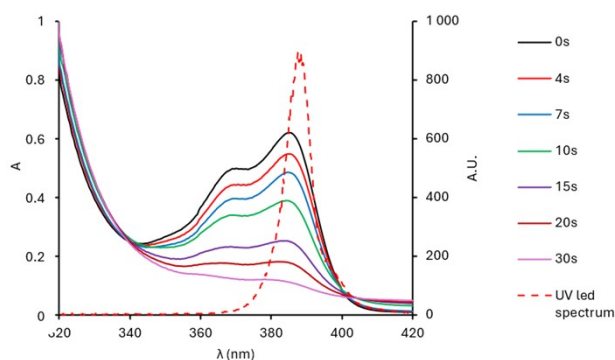

**Figure S2.** Changes in absorbance with the irradiation time ( $11 \text{ mW/cm}^2$ ) for the formulation containing 0 mM of 2PL and spectrum of the UV LED used during this work.

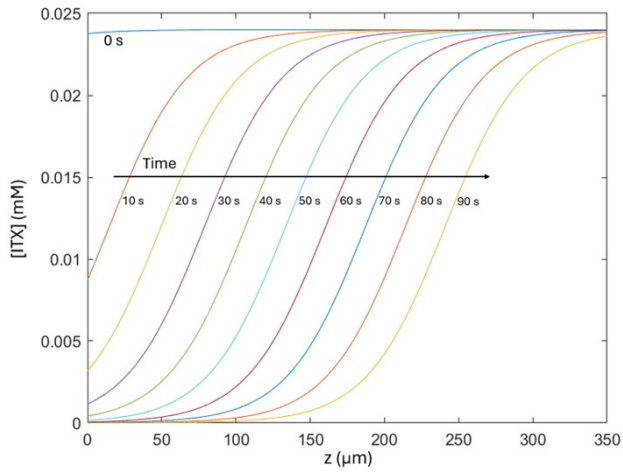

**Figure S3.** In-depth changes of [ITX] with the irradiation time calculated from eq. 3 to 6.

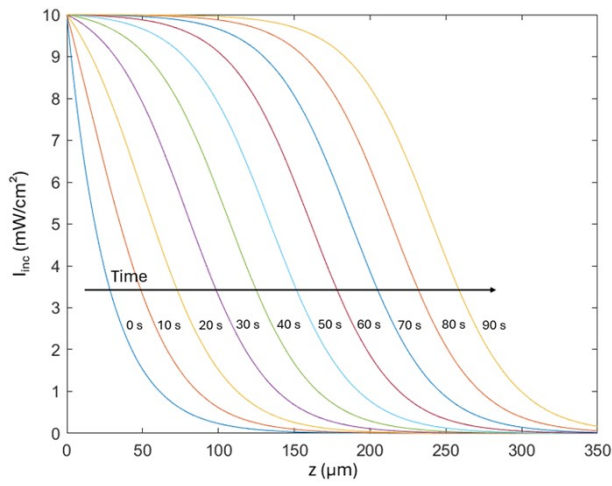

**Figure S4.** In-depth changes in the transmitted irradiance with the irradiation time calculated from eq. 3 to 6.

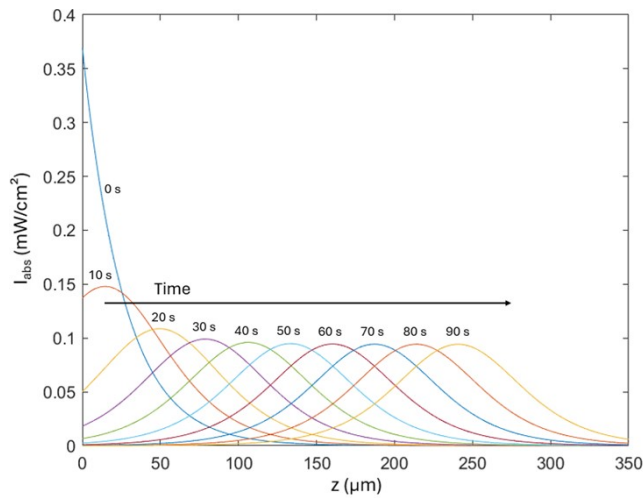

**Figure S5.** In-depth changes in the absorbed irradiance with the irradiation time calculated from eq. 3 to 6.
